# Supplementary material for: Catalytically engineered reduced graphene oxide/ZnO hybrid nanocomposites for the adsorption, photoactivity and selective oil pick-up from aqueous media
Source: Royal Society of Chemistry journal article supplement (doi:10.1039/c5ra04850h), 2015-01-01
Supplement: c5ra04850h1.pdf [file c5ra04850h1.pdf]

## Supplementary Information

### Catalytically Engineered Reduced Graphene Oxide/ZnO Hybrid Nanocomposites for the Adsorption, Photoactivity and Selective Oil Pick-Up from Aqueous Media

K. B. Babitha,<sup>a</sup> J. Jani Matilda,<sup>a</sup> A. Peer Mohamed,<sup>a</sup> and S. Ananthakumar<sup>\* a</sup>

*Functional Materials Section, Materials Science and Technology Division  
CSIR-National Institute for Interdisciplinary Science and Technology  
Industrial estate P.O. Thiruvananthapuram-695019, Kerala, INDIA*

\* Corresponding Author. Tel.: +91 471 2515289; fax: +91 471 2491712

E-mail addresses: [ananthakumar70@gmail.com](mailto:ananthakumar70@gmail.com); [ananthakumars@niist.res.in](mailto:ananthakumars@niist.res.in)

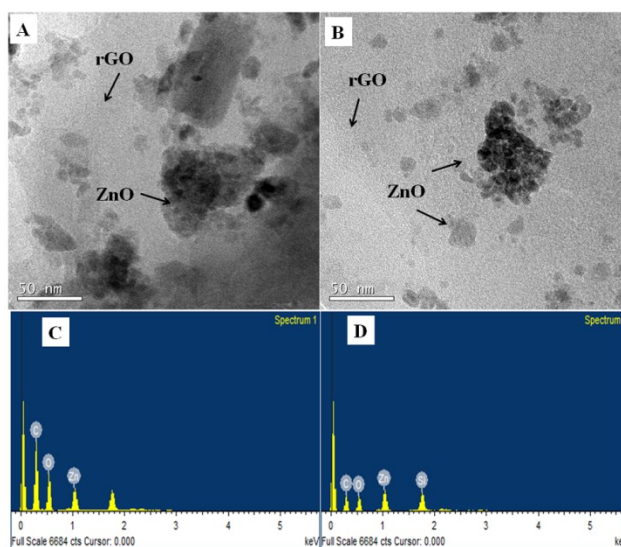

**Fig. S1** (A and B) TEM images of ZnO@rGO and ZnO/Si@rGO (C and D) EDX spectra of ZnO@rGO and ZnO/Si@rGO.

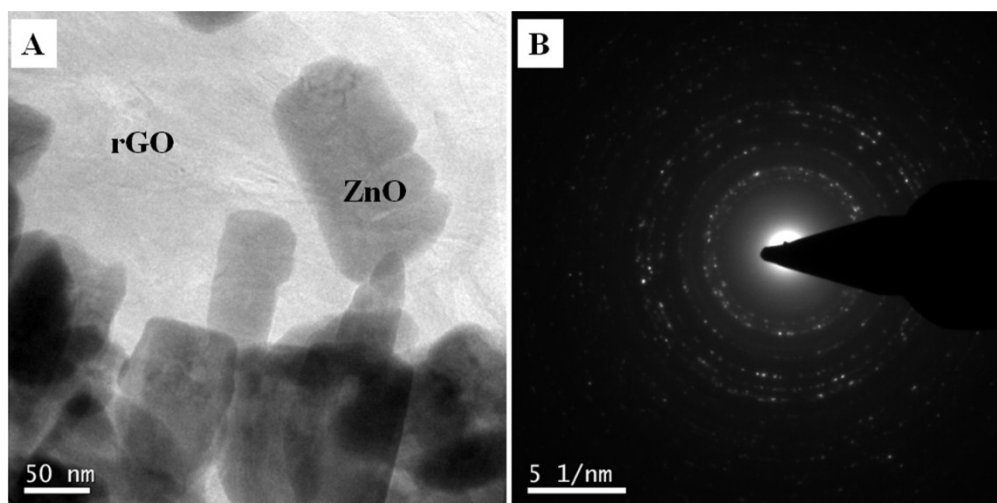

**Fig. S2** (A) TEM image and the corresponding SAED pattern of ZnO-rGO composite synthesized via physical blending technique.

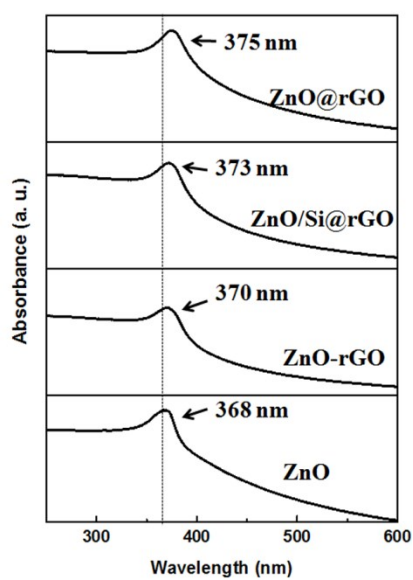

**Fig. S3** UV-vis absorption spectra of ZnO, ZnO-rGO, ZnO/Si@rGO and ZnO@rGO.

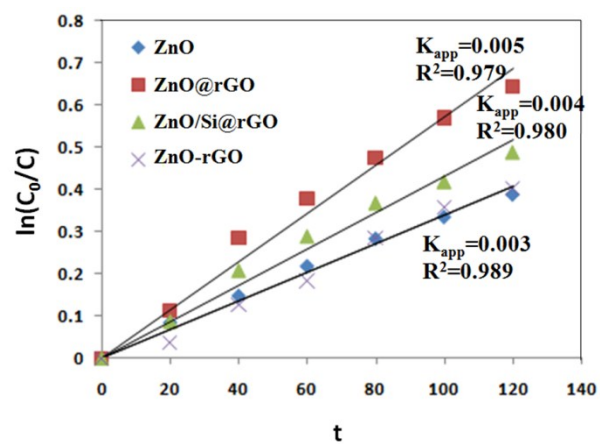

**Fig. S4** Plot of  $\ln(C_0/C)$  versus  $t$ .
